# Supplementary material
Source: PubMed Central journal article supplement (PMC9123366)
Supplement: mmc1.pdf [file mmc1.pdf]

**Supplemental Table S1: Clinical features, presenting symptoms, investigations and outcomes of the 10 patients with COVID-19 vaccine related myocarditis.**

|   | Age, Sex | Past Medical History                                | COVID Vaccinations    | Time from Vaccination to Hospital Presentation (days) | Presenting Symptoms                                              | ECG Changes                                                                                      | Peak hsTnT (ng/L) | CRP (mg/L) | Treatment                       | Hospital Stay (days) | Adverse Events                                    |
|---|----------|-----------------------------------------------------|-----------------------|-------------------------------------------------------|------------------------------------------------------------------|--------------------------------------------------------------------------------------------------|-------------------|------------|---------------------------------|----------------------|---------------------------------------------------|
| 1 | 21F      | Irritable bowel syndrome                            | Pfizer<br>Pfizer      | 3                                                     | Sharp central chest pain, radiation to back                      | Sinus tachycardia                                                                                | 408               | 3          | Ibuprofen                       | 6                    | Restarted on ibuprofen for recurrent chest pain   |
| 2 | 45M      | ADHD, depression, anxiety, irritable bowel syndrome | AstraZeneca<br>Pfizer | 4                                                     | Shortness of breath with intermittent burning central chest pain | Sinus rhythm with minimal diffuse ST elevation and PR depression                                 | 207               | 8          | Colchicine, metoprolol, aspirin | 5                    | None                                              |
| 3 | 31M      | Depression                                          | Pfizer<br>Moderna     | 20                                                    | Central chest heaviness, radiation to bilateral shoulders        | Sinus rhythm with inferior T wave inversion, mild diffuse PR depression                          | 367               | 7          | Ibuprofen and colchicine        | 4                    | Ibuprofen dose increased for recurrent chest pain |
| 4 | 21M      | None                                                | Pfizer<br>Moderna     | 3                                                     | Central chest pressure, worse with activity                      | Sinus rhythm with diffuse ST elevation in anterolateral and inferior leads, ST depression in aVR | 1760              | 25         | Ibuprofen and colchicine        | 3                    | None                                              |

|   |     |                                           |                    |   |                                                                                                                     |                                                                                     |      |     |                          |   |      |
|---|-----|-------------------------------------------|--------------------|---|---------------------------------------------------------------------------------------------------------------------|-------------------------------------------------------------------------------------|------|-----|--------------------------|---|------|
| 5 | 31M | None                                      | Pfizer<br>Moderna  | 4 | Central chest heaviness, radiation to bilateral arms. Associated palpitations, emesis and mild shortness of breath. | Sinus rhythm with diffuse ST elevation                                              | 1916 | N/A | Ibuprofen and colchicine | 3 | None |
| 6 | 30M | Female to male transition on testosterone | Pfizer<br>Moderna  | 3 | Aching chest pain, radiation to back and shoulders. Associated diaphoresis, weakness, nausea and diarrhea           | Sinus rhythm with early repolarization                                              | 404  | 13  | Colchicine               | 5 | None |
| 7 | 22M | None                                      | Moderna<br>Moderna | 3 | Fever, chills and diffuse myalgias since vaccination. Burning, central chest pain peaking on day of presentation    | Sinus rhythm with mild diffuse ST elevation and PR depression, ST depression in aVR | 232  | 91  | None                     | 3 | None |
| 8 | 23M | Female to male transition on testosterone | Pfizer<br>Moderna  | 2 | Sharp, pleuritic chest pain. Associated rhinitis, pharyngitis, headache, nausea and body aches                      | Sinus rhythm with diffuse ST elevation and mild PR depression, ST depression in aVR | 2007 | 92  | Ibuprofen and colchicine | 5 | None |
| 9 | 18M | None                                      | Pfizer<br>Moderna  | 2 | Central chest tightness, radiation to                                                                               | Sinus rhythm with early repolarization                                              | 547  | 35  | Ibuprofen and colchicine | 3 | None |

|    |     |      |                  |   |                               |                                                               |     |    |           |   |      |
|----|-----|------|------------------|---|-------------------------------|---------------------------------------------------------------|-----|----|-----------|---|------|
|    |     |      |                  |   | back, worse with inspiration  |                                                               |     |    |           |   |      |
| 10 | 18M | None | Pfizer<br>Pfizer | 3 | Chest pain, worse when supine | Sinus tachycardia with diffuse ST elevation and PR depression | 612 | 78 | Ibuprofen | 6 | None |

ADHD, Attention deficit hyperactivity disorder; CRP, C-reactive protein; ECG, Electrocardiogram; hsTnT, High sensitivity troponin T.

**Supplemental Table S2: Echocardiographic findings for 10 patients with COVID-19 vaccine induced myocarditis.**

|   | <b>LVEDD (cm)</b> | <b>LVEF (%)</b> | <b>Diastolic Function</b> | <b>Left-sided Filling pressures</b> | <b>RV size</b> | <b>RV function</b> | <b>RWMA</b>                                                                                    | <b>Endocardial GLS</b> | <b>Mid-myocardial GLS</b> | <b>Epicardial GLS</b> |
|---|-------------------|-----------------|---------------------------|-------------------------------------|----------------|--------------------|------------------------------------------------------------------------------------------------|------------------------|---------------------------|-----------------------|
| 1 | 4.3               | 60              | Normal                    | Normal                              | Normal         | Normal             | Basal anterior and basal lateral walls hypokinetic                                             |                        |                           |                       |
| 2 | 4.4               | 55              | Mild dysfunction          | Normal                              | Normal         | Normal             | Basal to mid anterior and basal lateral walls hypokinetic                                      | -17.8                  | -15.7                     | -14                   |
| 3 | 4.7               | 56              | Normal                    | Normal                              | Normal         | Normal             | Basal inferolateral and basal inferior walls hypokinetic                                       | -17.4                  |                           |                       |
| 4 | 4.7               | 45              | Moderate dysfunction      | High                                | Normal         | Normal             | Global hypokinesis, worst contraction of the basal to mid inferior and mid inferolateral walls |                        |                           |                       |
| 5 | 5.1               | 58              | Normal                    | Normal                              | Normal         | Normal             | Basal inferior and mid inferolateral walls                                                     |                        |                           |                       |
| 6 | 4.6               | 60              | Normal                    | Normal                              | Normal         | Normal             | None                                                                                           | -20.4                  | -18.3                     | -16.1                 |
| 7 | 4.6               | 57              | Normal                    | Normal                              | Normal         | Normal             | Basal to mid inferior wall hypokinetic                                                         | -15.5                  | -13.5                     | -11                   |
| 8 | 4.4               | 60              | Normal                    | Normal                              | Normal         | Normal             | None                                                                                           |                        |                           |                       |

|    |                  |    |        |        |        |        |                                                   |  |  |  |
|----|------------------|----|--------|--------|--------|--------|---------------------------------------------------|--|--|--|
| 9  | 4.7              | 58 | Normal | Normal | Normal | Normal | Basal inferior and inferoseptal walls hypokinetic |  |  |  |
| 10 | No TTE performed |    |        |        |        |        |                                                   |  |  |  |

GLS, Global longitudinal strain; LVEDD, Left ventricular end diastolic dimension; LVEF; Left ventricular ejection fraction; RV, Right ventricle; RWMA, Regional wall motion abnormalities; TTE, transthoracic echocardiography.

**Supplemental Table S3: Cardiac magnetic resonance imaging (CMR) findings in 10 patients with COVID-19 vaccine related myocarditis.**

|   | LV End Diastolic Volume (ml) | LV End Systolic Volume (ml) | LV Stroke Volume (ml) | LV Ejection Fraction (%) | Wall Motion Abnormality                                | Pericardial Effusion | Delayed Late Gadolinium Enhancement Location                                                                                                             |
|---|------------------------------|-----------------------------|-----------------------|--------------------------|--------------------------------------------------------|----------------------|----------------------------------------------------------------------------------------------------------------------------------------------------------|
| 1 | 107                          | 41                          | 66                    | 62                       | No                                                     | No                   | Sub-epicardial to mid-myocardial, involving the basal inferolateral wall                                                                                 |
| 2 | 138                          | 67                          | 71                    | 51                       | No                                                     | No                   | Sub-epicardial, involving lateral wall of the mid chamber                                                                                                |
| 3 | 146                          | 63                          | 83                    | 57                       | No                                                     | No                   | Sub-epicardial, involving the basal to mid lateral wall and basal to mid inferior wall                                                                   |
| 4 | 149                          | 71                          | 77                    | 52                       | No                                                     | No                   | Mid-myocardial and epicardial, involving the basal lateral and inferior wall. Sub-epicardial, involving the inferolateral wall at the mid cavitory level |
| 5 | 176                          | 89                          | 88                    | 50                       | Moderate hypokinesis of the mid to distal lateral wall | No                   | Mid-myocardial, involving the mid to distal lateral wall                                                                                                 |

|    |     |    |    |    |    |    |                                                                                                                            |
|----|-----|----|----|----|----|----|----------------------------------------------------------------------------------------------------------------------------|
| 6  | 140 | 51 | 89 | 64 | No | No | Mid-myocardial, involving the mid inferior septal and mid inferior regions. Sub-epicardial, involving the mid lateral wall |
| 7  | 132 | 48 | 84 | 64 | No | No | Sub-epicardial, involving the mid lateral wall                                                                             |
| 8  | 127 | 50 | 77 | 61 | No | No | Sub-epicardial, involving the mid to distal lateral wall                                                                   |
| 9  | 155 | 63 | 93 | 60 | No | No | Mid-myocardial, involving the mid lateral wall                                                                             |
| 10 | 149 | 53 | 96 | 64 | No | No | Sub-epicardial, involving the mid to distal lateral wall                                                                   |

LV, left ventricle.
